# Supplementary material for: Effectiveness of COVID-19 vaccines against SARS-CoV-2 variants of concern: a systematic review and meta-analysis
Source: bioRxiv or medRxiv preprint supplement (doi:10.1101/2021.09.23.21264048), 2021-09-26
Supplement: Supplementary file [file media-1.pdf]

# Supplementary Material

## Search strategy (August 31, 2021)

### Search strategy for Embase (934 items)

1. 'coronavirus disease 2019'/exp OR 'Severe acute respiratory syndrome coronavirus 2'/exp OR (COVID-19 OR SARS-CoV-2):ti,ab
2. vaccine/exp OR vaccination/exp OR immunization/exp OR (vaccin\* OR immuniz\*):ti,ab
3. (variant\* OR B.1.1.7 OR B.1.351 OR P.1 OR B.1.617.2):ti,ab
4. #1 AND #2 AND #3

### Search strategy for Pubmed (1203 items)

1. COVID-19[Mesh] OR SARS-CoV-2[Mesh] OR "COVID-19 Vaccines"[Mesh] OR COVID-19[Title/Abstract] OR SARS-CoV-2[Title/Abstract]
2. vaccines[Mesh] OR vaccination[Mesh] OR immunization[Mesh] OR vaccin\*[Title/Abstract] OR immuniz\*[Title/Abstract]
3. variant\*[Title/Abstract] OR B.1.1.7[Title/Abstract] OR B.1.351[Title/Abstract] OR P.1[Title/Abstract] OR B.1.617.2[Title/Abstract]
4. #1 OR #2 OR #3

### Search strategy for Cochrane Library (23 items)

1. [mh COVID-19]
2. [mh SARS-CoV-2]
3. COVID-19:ti,ab
4. SARS-CoV-2:ti,ab
5. #1 OR #2 OR #3 OR #4
6. [mh vaccines]
7. [mh vaccination]
8. [mh immunization]
9. vaccin\*:ti,ab
10. immuniz\*:ti,ab
11. #6 OR #7 OR #8 OR #9 OR #10
12. (variant\* OR B.1.1.7 OR B.1.351 OR P.1 OR B.1.617.2):ti,ab
13. #5 AND #11 AND #12

### Search strategy for Clinicaltrial.gov (66 items)

(vaccines OR vaccine OR vaccination OR immunization) AND (variant OR variants) AND (COVID-19 OR SARS-CoV-2)

### Search strategy for medRxiv (596 items)

(vaccin\*) AND (variant\*) AND (COVID-19 OR SARS-CoV-2) AND (Efficacy OR Effectiveness)

## Supplementary Figure

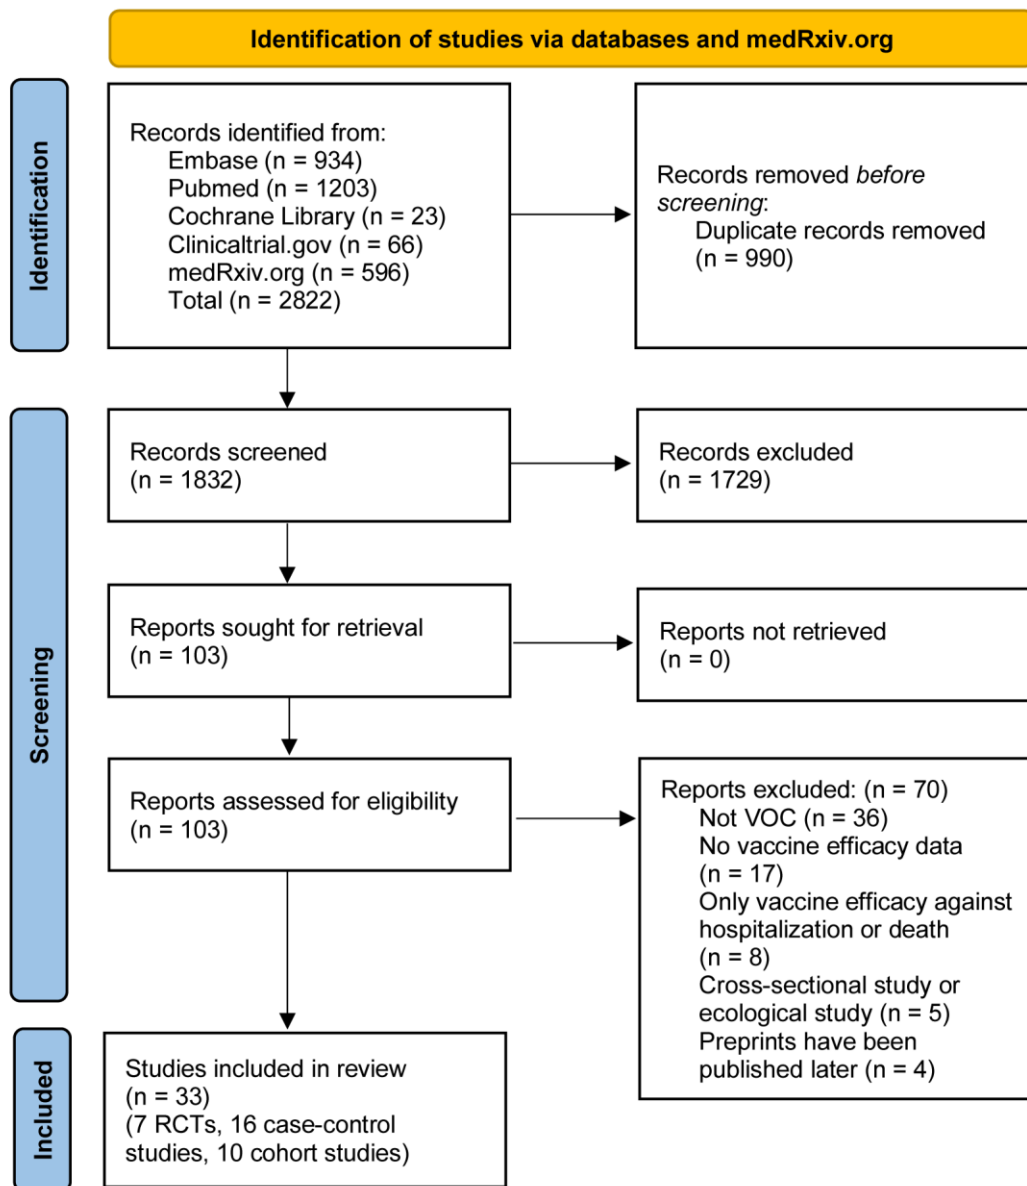

**Supplementary Figure 1.** Flow chart of literature search and study selection.

## Supplementary Tables

**Supplementary Table 1.** Risk of bias for included RCTs

| Study (First author) | Randomization process | Deviations from intended interventions | Missing outcome data | Measurement of the outcome | Selection of the reported result | Overall bias  |
|----------------------|-----------------------|----------------------------------------|----------------------|----------------------------|----------------------------------|---------------|
| Heath                | Low                   | Some concerns                          | Some concerns        | Low                        | Some concerns                    | Some concerns |
| Emary                | Low                   | Some concerns                          | Some concerns        | Low                        | Some concerns                    | Some concerns |
| Shinde               | Low                   | Low                                    | Some concerns        | Low                        | Some concerns                    | Some concerns |
| Madhi                | Low                   | Some concerns                          | Low                  | Low                        | Some concerns                    | Some concerns |
| Sadoff               | Low                   | Some concerns                          | Some concerns        | Low                        | Low                              | Some concerns |
| Thomas (preprint)    | Low                   | Some concerns                          | Low                  | Low                        | Low                              | Some concerns |
| Ella (preprint)      | Low                   | Some concerns                          | Some concerns        | Low                        | Low                              | Some concerns |

**Supplementary Table 2.** Risk of bias for included cohort studies

|                    | Selection |        |        |        | Comparability | Exposure |        |        | Total score | Quality  |
|--------------------|-----------|--------|--------|--------|---------------|----------|--------|--------|-------------|----------|
|                    | Item 1    | Item 2 | Item 3 | Item 4 | Item 5        | Item 6   | Item 7 | Item 7 |             |          |
| Hall               | 1         | 1      | 1      | 1      | 1             | 1        | 1      | 1      | 8           | Good     |
| Haas               | 1         | 1      | 1      | 0      | 1             | 1        | 1      | 1      | 7           | Good     |
| Lumley             | 1         | 1      | 1      | 0      | 1             | 1        | 1      | 1      | 7           | Good     |
| Williams           | 0         | 1      | 1      | 0      | 0             | 0        | 1      | 1      | 4           | Moderate |
| Nanduri            | 1         | 1      | 1      | 0      | 1             | 1        | 1      | 1      | 7           | Good     |
| Fowlkes            | 0         | 1      | 1      | 0      | 1             | 0        | 1      | 1      | 5           | Moderate |
| Puranik (preprint) | 1         | 1      | 1      | 0      | 2             | 1        | 1      | 1      | 8           | Good     |
| Lefèvre (preprint) | 0         | 1      | 1      | 0      | 1             | 1        | 1      | 1      | 6           | Moderate |
| Dagan              | 1         | 1      | 1      | 0      | 2             | 1        | 1      | 1      | 8           | Good     |
| Pouwels (preprint) | 1         | 1      | 1      | 0      | 2             | 1        | 1      | 1      | 8           | Good     |

Item 1: Representativeness of the exposed cohort.

Item 2: Selection of the non-exposed cohort.

Item 3: Ascertainment of exposure.

Item 4: Demonstration that outcome of interest was not present at start of study.

Item 5: Comparability of cohorts on the basis of the design or analysis.

Item 6: Assessment of outcome.

Item 7: Was follow up long enough for outcomes to occur.

Item 8: Adequacy of follow up of cohorts.

**Supplementary Table 3.** Risk of bias for included case-control studies

|                        | Selection |        |        |        | Comparability<br>Item 5 | Exposure |        |        | Total score | Quality  |
|------------------------|-----------|--------|--------|--------|-------------------------|----------|--------|--------|-------------|----------|
|                        | Item 1    | Item 2 | Item 3 | Item 4 |                         | Item 6   | Item 7 | Item 7 |             |          |
| Charmet                | 1         | 1      | 1      | 1      | 1                       | 1        | 0      | 1      | 7           | Good     |
| Nasreen (preprint)     | 1         | 1      | 1      | 1      | 1                       | 1        | 1      | 1      | 8           | Good     |
| Skowronski             | 1         | 0      | 1      | 1      | 1                       | 1        | 1      | 1      | 7           | Good     |
| Hitchings (preprint)   | 1         | 0      | 1      | 1      | 0                       | 1        | 1      | 1      | 6           | Moderate |
| Ranzani                | 1         | 0      | 1      | 1      | 2                       | 1        | 1      | 1      | 8           | Good     |
| Lopez Bernal           | 1         | 1      | 1      | 1      | 2                       | 1        | 1      | 1      | 9           | Good     |
| Tang (preprint)        | 1         | 1      | 1      | 1      | 2                       | 1        | 1      | 1      | 9           | Good     |
| Li                     | 1         | 0      | 1      | 1      | 1                       | 1        | 1      | 1      | 7           | Good     |
| Abu-Raddad             | 1         | 1      | 1      | 1      | 2                       | 1        | 1      | 1      | 9           | Good     |
| Sheikh                 | 1         | 0      | 1      | 1      | 0                       | 1        | 1      | 1      | 6           | Moderate |
| Chemaitelly            | 1         | 1      | 1      | 1      | 2                       | 1        | 1      | 1      | 9           | Good     |
| Bernal                 | 1         | 0      | 1      | 1      | 1                       | 1        | 1      | 1      | 7           | Good     |
| Chung                  | 1         | 1      | 1      | 1      | 1                       | 1        | 1      | 1      | 8           | Good     |
| Carazo                 | 1         | 0      | 1      | 1      | 1                       | 1        | 1      | 1      | 7           | Good     |
| Chemaitelly (preprint) | 1         | 1      | 1      | 1      | 2                       | 1        | 1      | 1      | 9           | Good     |
| Pramod (preprint)      | 1         | 0      | 1      | 1      | 1                       | 1        | 1      | 0      | 6           | Moderate |

Item 1: Is the case definition adequate?

Item 2: Representativeness of the cases.

Item 3: Selection of controls.

Item 4: Definition of controls.

Item 5: Comparability of cases and controls on the basis of the design or analysis.

Item 6: Ascertainment of exposure.

Item 7: Same method of ascertainment for cases and controls.

Item 8: Non-Response Rate.

**Supplementary Table 4. VE of COVID-19 vaccines against B.1.1.7 (Alpha) variant**

| First author/Country | Study design     | Vaccine/control Cases/controls | or | Participants | Age (years)             | Vaccine                | Outcomes       | Day_1 | VE% of one dose (95% CI) | Day_2 | VE% of two doses (95% CI) | Variants         |
|----------------------|------------------|--------------------------------|----|--------------|-------------------------|------------------------|----------------|-------|--------------------------|-------|---------------------------|------------------|
| Heath/UK             | RCT              | 7,020/7,020                    |    | GP           | 18-84                   | NVX-CoV2373            | Symptomatic    | NA    | NA                       | 7     | 86.3 (71.3–93.5)          | Alpha            |
| Emary/UK             | RCT              | 4,244/4,290                    |    | GP           | ≥18                     | ChAdOx1                | Symptomatic    | NA    | NA                       | 14    | 70.4 (43.6–84.5)          | Alpha            |
| Hall/UK              | Cohort           | 8,203/15,121                   |    | HCWs         | ≥18                     | BNT162b2               | All infections | 21    | 72.0 (58.0–86.0)         | 7     | 86.0 (76.0–97.0)          | Alpha (>50%)     |
| Haas/Israel          | Cohort           | 4,714,932/1,823,979            |    | GP           | ≥16                     | BNT162b2               | All infections | NA    | NA                       | 7     | 96.5 (96.3–96.8)          | Alpha (95%)      |
| Lumley/UK            | Cohort           | 10,651/10,513                  |    | HCWs         | 39 (30-50) <sup>1</sup> | BNT162b2/<br>ChAdOx1   | All infections | 14    | 21.0 (-3.0–39.0)         | 14    | 82.0 (27.0–95.0)          | Alpha (51%)      |
| Dagan/Israel         | Cohort           | 596,618/596,618                |    | GP           | ≥16                     | BNT162b2               | All infections | 14-21 | 46.0 (40.0–51.0)         | 7     | 92.0 (88.0–95.0)          | Alpha (80%)      |
| Pouwels/UK           | Cohort           | 384,543 (total)                |    | GP           | ≥18                     | BNT162b2               | All infections | 21    | 59.0 (52.0–65.0)         | 14    | 78.0 (68.0–84.0)          | Alpha            |
|                      | <i>_preprint</i> |                                |    | GP           | ≥18                     | ChAdOx1                | All infections | 21    | 63.0 (55.0–69.0)         | 14    | 79.0 (56.0–90.0)          | Alpha (dominant) |
| Lopez Bernal/UK      | TNCC             | 9,682/171,834                  |    | GP           | ≥16                     | BNT162b2/<br>ChAdOx1   | Symptomatic    | 21    | 48.7 (45.5–51.7)         | 14    | 87.5 (85.1–89.5)          | Alpha            |
|                      |                  | 7,812/120,761                  |    | GP           | ≥16                     | BNT162b2               | Symptomatic    | 21    | 47.5 (41.6–52.8)         | 14    | 93.7 (91.6–95.3)          | Alpha            |
|                      |                  | 9,183/147,444                  |    | GP           | ≥16                     | ChAdOx1                | Symptomatic    | 21    | 48.7 (45.2–51.9)         | 14    | 74.5 (68.4–79.4)          | Alpha            |
| Abu-Raddad/Qatar     | TNCC             | 19,017/19,432                  |    | GP           | 33 (22-40) <sup>1</sup> | BNT162b2               | All infections | 0     | 29.5 (22.9–35.5)         | 14    | 89.5 (85.9–92.3)          | Alpha            |
| Bernal/UK            | TNCC             | 3,034/9,487                    |    | Older        | ≥70                     | BNT162b2               | Symptomatic    | 21    | 36.2 (23.7–46.6)         | 14    | 90.0 (84.0–94.0)          | Alpha            |
| Chemaitelly/Qatar    | TNCC             | 23,904/23,951                  |    | GP           | 32 (25-39) <sup>1</sup> | mRNA-1273              | All infections | 14    | 88.1 (83.7–91.5)         | 14    | 100 (91.8–100)            | Alpha            |
| Charmet/France       | Case-cont<br>rol | 31,313/3,644                   |    | GP           | ≥20                     | BNT162b2/<br>mRNA-1273 | All infections | NA    | NA                       | 7     | 86.0 (81.0–90.0)          | Alpha            |
| Skowronski/Canada    | TNCC             | 303/10,388                     |    | Older        | ≥70                     | BNT162b2/<br>mRNA-1273 | All infections | 21    | 67.0 (57.0–75.0)         | NA    | NA                        | Alpha            |
| Sheikh/UK            | TNCC             | 6,205/187,318                  |    | GP           | NA                      | BNT162b2               | All infections | 28    | 38.0 (29.0–45.0)         | 14    | 92.0 (90.0–93.0)          | Alpha            |
|                      |                  | 6,884/203,579                  |    | GP           | NA                      | ChAdOx1                | All infections | 28    | 37.0 (32.0–42.0)         | 14    | 73.0 (66.0–78.0)          | Alpha            |
| Carazo/Canada        | TNCC             | 901/46,862                     |    | HCWs         | 18-74                   | BNT162b2/<br>mRNA-1273 | All infections | 14    | 60.0 (53.6–65.5)         | 7     | 92.6 (87.1–95.8)          | Alpha            |

|                                       |      |                |    |                         |                        |                |    |                  |              |                   |       |
|---------------------------------------|------|----------------|----|-------------------------|------------------------|----------------|----|------------------|--------------|-------------------|-------|
| Chung/Canada                          | TNCC | 12,582/259,986 | GP | ≥16                     | BNT162b2/<br>mRNA-1273 | Symptomatic    | 14 | 61.0 (56.0–66.0) | 7            | 90.0 (85.0–94.0)  | Alpha |
| Chemaitelly/Qatar<br><i>_preprint</i> | TNCC | 1,888/1,888    | GP | 32 (23-39) <sup>1</sup> | BNT162b2               | All infections | 14 | 54.9 (28.0–72.4) | 0-4<br>weeks | 67.8 (57.1–76.1)  | Alpha |
| Nasreen/Canada<br><i>_preprint</i>    | TNCC | 368,323/51,540 | GP | ≥16                     | BNT162b2               | Symptomatic    | 21 | 69.0 (67.0–71.0) | 14           | 89.0 (87.0–91.0)  | Alpha |
|                                       |      |                | GP | ≥16                     | mRNA-1273              | Symptomatic    | 21 | 84.0 (80.0–86.0) | 14           | 91.0 (84.0–95.0)  | Alpha |
|                                       |      |                | GP | ≥16                     | ChAdOx1                | Symptomatic    | 21 | 72.0 (68.0–76.0) | 14           | 75.0 (-98.0–97.0) | Alpha |

Abbreviations: VE, vaccine effectiveness; HCWs, healthcare workers; TNCC, test-negative case-control; GP, general population; Day\_1, days after the 1<sup>st</sup> dose; Day\_2, days after the 2<sup>nd</sup> dose; RCT, randomized controlled trial; CI, confidence interval.

<sup>1</sup> Median age (interquartile range)

**Supplementary Table 5. VE of COVID-19 vaccines against B.1.351 (Beta) and P.1 (Gamma) variant**

| First author/Country                | Study design | Vaccine/control Cases/controls | or | Participants      | Age (years)             | Vaccine                | Outcomes       | Day_1 | VE% of one dose (95% CI) | Day_2     | VE% of two doses (95% CI) | Variants                     |
|-------------------------------------|--------------|--------------------------------|----|-------------------|-------------------------|------------------------|----------------|-------|--------------------------|-----------|---------------------------|------------------------------|
| Shinde/South Africa                 | RCT          | 1,357/1,327                    |    | GP                | 18-84                   | NVX-CoV2373            | Symptomatic    | NA    | NA                       | NA        | 51.1 (-0.6–76.2)          | Beta                         |
| Madhi/South Africa                  | RCT          | 750/714                        |    | GP                | 18-65                   | ChAdOx1                | Symptomatic    | NA    | NA                       | NA        | 10.4 (-76.8–54.8)         | Beta                         |
| Sadoff/South Africa                 | RCT          | 2,473/2,496                    |    | GP                | ≥18                     | Ad26.COVS.S            | Symptomatic    | 14    | 52.0 (30.3–67.4)         | NA        | NA                        | Beta                         |
|                                     | RCT          | 2,473/2,496                    |    | GP                | ≥18                     | Ad26.COVS.S            | Symptomatic    | 28    | 64.0 (41.2–78.7)         | NA        | NA                        | Beta                         |
| Thomas/South Africa <i>preprint</i> | RCT          | 291/276                        |    | GP                | ≥16                     | BNT162b2               | All infections | NA    | NA                       | 7         | 100 (53.5–100)            | Beta                         |
| Abu-Raddad/Qatar                    | TNCC         | 21,685/22,204                  |    | GP                | 33 (22-40) <sup>1</sup> | BNT162b2               | All infections | 0     | 16.9 (10.4–23.0)         | 14        | 75.0 (70.5–78.9)          | Beta                         |
| Chemaitelly/Qatar                   | TNCC         | 48,297/48,456                  |    | GP                | 32 (25-39) <sup>1</sup> | mRNA-1273              | All infections | 14    | 61.3 (56.5–65.5)         | 14        | 96.4 (91.9–98.7)          | Beta                         |
| Charmet/France                      | Case-control | 2,550/3,644                    |    | GP                | ≥20                     | BNT162b2/<br>mRNA-1273 | All infections | NA    | NA                       | 7         | 77.0 (63.0–86.0)          | Beta (95.1%)<br>Gamma (4.9%) |
| Lefèvre/France                      | Cohort       | 338/40                         |    | LTCH              | 89 (83-92) <sup>1</sup> | BNT162b2               | All infections | 14    | 55.0 (13.0–76.0)         | 7         | 49.0 (14.0–69.0)          | Beta                         |
| Chemaitelly/Qatar <i>preprint</i>   | TNCC         | 3,277/3,277                    |    | GP                | 32 (23-39) <sup>1</sup> | BNT162b2               | All infections | 14    | 26.1 (0.0-45.7)          | 0-4 weeks | 74.3 (68.5-79.2)          | Beta                         |
| Williams/Canada                     | Cohort       | 48/12                          |    | Residents of LTCH | NA                      | mRNA-1273              | All infections | NA    | NA                       | 14        | 52.5 (26.9–69.1)          | Gamma                        |
|                                     |              | 43/40                          |    | Staff of LTCH     | NA                      | mRNA-1273              | All infections | NA    | NA                       | 14        | 66.2 (2.3–88.3)           | Gamma                        |
| Ranzani/Brazil                      | TNCC         | 26,433/17,622                  |    | Older             | ≥70                     | CoronaVac              | Symptomatic    | 14    | 12.5 (3.7–20.6)          | 14        | 46.8 (38.7–53.8)          | Gamma                        |
| Skowronski/Canada                   | TNCC         | 180/10,388                     |    | Older             | ≥70                     | BNT162b2/<br>mRNA-1273 | All infections | 21    | 61.0 (45.0–72.0)         | NA        | NA                        | Gamma                        |
| Hitchings/Brazil <i>preprint</i>    | TNCC         | 418/418                        |    | HCWs              | ≥18                     | CoronaVac              | Symptomatic    | NA    | NA                       | 14        | 36.8 (-54.9–74.2)         | Gamma (66%)                  |
| Chung/ Canada                       | TNCC         | NA/259,986                     |    | GP                | ≥16                     | BNT162b2/<br>mRNA-1273 | Symptomatic    | 14    | 43.0 (22.0–59.0)         | 7         | 88.0 (61.0–96.0)          | Beta/Gamma                   |



|                                    |      |               |    |     |           |             |    |                  |    |                  |            |
|------------------------------------|------|---------------|----|-----|-----------|-------------|----|------------------|----|------------------|------------|
| Nasreen/Canada_pre<br><i>print</i> | TNCC | 3,005/351,540 | GP | ≥16 | BNT162b2  | Symptomatic | 21 | 65.0 (56.0–71.0) | 14 | 85.0 (70.0–93.0) | Beta/Gamma |
|                                    |      |               | GP | ≥16 | mRNA-1273 | Symptomatic | 21 | 78.0 (60.0–88.0) | NA | NA               | Beta/Gamma |
|                                    |      |               | GP | ≥16 | ChAdOx1   | Symptomatic | 21 | 50.0 (27.0–66.0) | NA | NA               | Beta/Gamma |

Abbreviations: VE, vaccine effectiveness; HCWs, healthcare workers; TNCC, test-negative case-control; LTCH, long term care homes; GP, general population; Day\_1, days after the 1<sup>st</sup> dose; Day\_2, days after the 2<sup>nd</sup> dose; RCT, randomized controlled trial; CI, confidence interval.

<sup>1</sup> Median age (interquartile range)

**Supplementary Table 6. VE of COVID-19 vaccines against B.1.617.2 (Delta) variant**

| First author/<br>Country       | Study<br>design | Vaccine/control<br>Cases/controls | or | Participants         | Age<br>(years) | Vaccine                | Outcomes       | Day_1 | VE% of one dose<br>(95% CI) | Day_2        | VE% of two doses<br>(95% CI) | Variants    |
|--------------------------------|-----------------|-----------------------------------|----|----------------------|----------------|------------------------|----------------|-------|-----------------------------|--------------|------------------------------|-------------|
| Ella/India/_preprint           | RCT             | 8,471/8,502                       |    | GP                   | 18-98          | BBV152                 | Symptomatic    | NA    | NA                          | 14           | 65.2 (33.1–83.0)             | Delta       |
| Lopez Bernal/UK                | TNCC            | 5,876/171,834                     |    | GP                   | ≥16            | BNT162b2/<br>ChAdOx1   | Symptomatic    | 21    | 30.7 (25.2–35.7)            | 14           | 79.6 (76.7–82.1)             | Delta       |
|                                |                 | 4,302/120,761                     |    | GP                   | ≥16            | BNT162b2               | Symptomatic    | 21    | 35.6 (22.7–46.4)            | 14           | 88.0 (85.3–90.1)             | Delta       |
|                                |                 | 5,617/147,444                     |    | GP                   | ≥16            | ChAdOx1                | Symptomatic    | 21    | 30.0 (24.3–35.3)            | 14           | 67.0 (61.3–71.8)             | Delta       |
| Li/China                       | TNCC            | 74/292                            |    | GP                   | 18-59          | CoronaVac/<br>CNBG     | All infections | 14    | 13.8 (-60.2–54.8)           | 14           | 59.0 (16.0–81.6)             | Delta       |
| Nanduri/US                     | Cohort          | 5,011,746/953,861                 |    | Nursing<br>home      | NA             | BNT162b2/<br>mRNA-1273 | All infections | NA    | NA                          | 14           | 53.1 (49.1–56.7)             | Delta       |
|                                |                 | 3,248,732/953,861                 |    |                      | NA             | BNT162b2               | All infections | NA    | NA                          | 14           | 52.4 (48.0–56.4)             | Delta       |
|                                |                 | 1,763,014/953,861                 |    |                      | NA             | mRNA-1273              | All infections | NA    | NA                          | 14           | 50.6 (45.0–55.7)             | Delta       |
| Fowlkes/US                     | Cohort          | 2,352/488                         |    | Frontline<br>workers | NA             | mRNA-1273/<br>BNT162b2 | All infections | NA    | NA                          | 14           | 66.0 (26.0–84.0)             | Delta       |
| Sheikh/UK                      | TNCC            | 4,043/185,156                     |    | GP                   | NA             | BNT162b2               | All infections | 28    | 30.0 (17.0–41.0)            | 14           | 79.0 (75.0–82.0)             | Delta       |
|                                |                 | 4,679/201,374                     |    | GP                   | NA             | ChAdOx1                | All infections | 28    | 18.0 (9.0–25.0)             | 14           | 60.0 (53.0–66.0)             | Delta       |
| Puranik/US_preprint            | Cohort          | 21,079/24,444                     |    | GP                   | ≥18            | mRNA-1273              | All infections | NA    | NA                          | 14           | 76.0 (58.0–87.0)             | Delta (70%) |
|                                |                 | 21,946/24,444                     |    | GP                   | ≥18            | BNT162b2               | All infections | NA    | NA                          | 14           | 42.0 (13.0–62.0)             | Delta (70%) |
| Chemaitelly/Qatar<br>_preprint | TNCC            | 1,935/1,935                       |    | GP                   | 32 (23-39)     | BNT162b2               | All infections | 14    | 67.4 (46.3–80.9)            | 0-4<br>weeks | 83.8 (73.6–90.5)             | Delta       |
| Nasreen/Canada<br>_preprint    | TNCC            | 991/351,540                       |    | GP                   | ≥16            | BNT162b2               | Symptomatic    | 21    | 61.0 (51.0–70.0)            | 14           | 85.0 (59.0–94.0)             | Delta       |
|                                |                 |                                   |    | GP                   | ≥16            | mRNA-1273              | Symptomatic    | 21    | 70.0 (52.0–81.0)            | NA           | NA                           | Delta       |
|                                |                 |                                   |    | GP                   | ≥16            | ChAdOx1                | Symptomatic    | 21    | 70.0 (46.0–83.0)            | NA           | NA                           | Delta       |
| Tang/Qatar                     | TNCC            | 1,959/1,959                       |    | GP                   | 31 (24-37)     | BNT162b2/              | All infections | 14    | 70.5 (55.2–80.6)            | 14           | 63.3 (55.7–69.6)             | Delta       |

|                  |        |                 |      |            |           |                |    |                  |    |                  |            |
|------------------|--------|-----------------|------|------------|-----------|----------------|----|------------------|----|------------------|------------|
| <i>_preprint</i> |        |                 |      |            | mRNA-1273 |                |    |                  |    |                  |            |
|                  |        | 1,830/1,830     | GP   | 31 (24-37) | BNT162b2  | All infections | 14 | 65.5 (40.9–79.9) | 14 | 59.6 (50.7–66.9) | Delta      |
|                  |        | 1,666/1,666     | GP   | 31 (24-37) | mRNA-1273 | All infections | 14 | 79.7 (60.8–89.5) | 14 | 86.1 (78.0–91.3) | Delta      |
| Pramod/India     | TNCC   | 360/360         | HCWs | 34 (28-43) | ChAdOx1-S | All infections | 21 | 49.0 (17.0–68.0) | 14 | 54.0 (27.0–71.0) | Delta      |
| <i>_preprint</i> |        |                 |      |            |           |                |    |                  |    |                  |            |
| Pouwels/UK       | Cohort | 358,983 (total) | GP   | ≥18        | BNT162b2  | All infections | 21 | 57.0 (50.0–63.0) | 14 | 80.0 (77.0–83.0) | Delta      |
| <i>_preprint</i> |        |                 |      |            |           |                |    |                  |    |                  | (dominant) |
|                  |        |                 | GP   | ≥18        | ChAdOx1   | All infections | 21 | 46.0 (35.0–55.0) | 14 | 67.0 (62.0–71.0) | Delta      |
|                  |        |                 | GP   | 18–64      | mRNA-1273 | All infections | 21 | 75.0 (64.0–83.0) | NA | NA               | Delta      |

Abbreviations: VE, vaccine effectiveness; HCWs, healthcare workers; TNCC, test-negative case-control; LTCH, long term care homes; GP, general population; Day\_1, days after the 1<sup>st</sup> dose; Day\_2, days after the 2<sup>nd</sup> dose; RCT, randomized controlled trial; CI, confidence interval.

<sup>1</sup> Median age (interquartile range)
